# Supplementary material for: Very strong interaction between FeN4 and titanium carbide for durable 4-electron oxygen reduction reaction suppressing catalyst deactivation by peroxide
Source: Royal Society of Chemistry journal article supplement (doi:10.1039/d2ta06496k), 2022-01-01
Supplement: d2ta06496k1.pdf [file d2ta06496k1.pdf]

**Very strong interaction between FeN<sub>4</sub> and titanium carbide for durable  
4-electron oxygen reduction reaction suppressing catalyst deactivation  
by peroxide**

Yeongdae Lee,<sup>‡a</sup> Jang Hyuk Ahn,<sup>‡a</sup> Haeseong Jang,<sup>‡b</sup> Jisu Lee,<sup>a</sup> Subhin Yoon,<sup>a</sup> Dong-Gyu  
Lee,<sup>a</sup> Min Gyu Kim,<sup>\*b</sup> Jun Hee Lee,<sup>\*a</sup> Hyun-Kon Song<sup>\*a</sup>

## Computational Details

The Vienna ab initio simulation package (VASP)<sup>1-4</sup> with projector augmented wave (PAW) pseudopotentials was used for density functional theory (DFT) calculation.<sup>5,6</sup> For the exchange-correlation energy, the Perdew-Burke-Ernzerhof (PBE)<sup>7</sup> and the PBE functional with van der Waals interaction of the Grimme's method PBE-D2<sup>8</sup> using the default parameter was utilized with a plane-wave cutoff of 500 eV. All calculations were spin-polarized and Gaussian smearing method with the 1.0E-6 eV energy criteria was applied for electronic self-consistent loop. Atomic positions were relaxed until interatomic force on uninhibited atoms were smaller than 0.02 eV/Å. The crystal orbital Hamilton populations (COHPs) were calculated to investigate the bond orbital interaction between metal and oxygen species.<sup>9-13</sup>

Minimum 15 Å-thick vacuum was introduced to the FePc and FePc/1L-Ti<sub>3</sub>C<sub>2</sub> slabs along the z-direction to reduce the periodic image interference. The single FePc molecule was constructed to have its square-planar plane on the xy-plane. The FePc slab was 18.5 Å × 18.5 Å × 29.2 Å (**Fig. S6a**). The slab of FePc supported by 1L-Ti<sub>3</sub>C<sub>2</sub> (FePc/1L-Ti<sub>3</sub>C<sub>2</sub>) was constructed by placing the single FePc molecule along the z-direction on the 1L-Ti<sub>3</sub>C<sub>2</sub> support supercell slab having 108 titanium and 72 carbon atoms in 18.6 Å × 18.6 Å × 29.3 Å (**Fig. S6b**). The Brillouin zone was integrated with 2 × 2 × 1 Gamma grid k-point mesh. The FePc/1L-Ti<sub>3</sub>C<sub>2</sub> slab was thermodynamically most stable when a single Fe atom of FePc was coordinated two Ti atoms of 1L-Ti<sub>3</sub>C<sub>2</sub> (double coordination via FeTi<sub>2</sub> in **Fig. S7**).

The ORR proceeded on the Fe atom of both supported and unsupported FePc. On the four-electron (4e) ORR process in alkaline media, molecular oxygen is reduced to hydroxide ions via:<sup>14-16</sup>

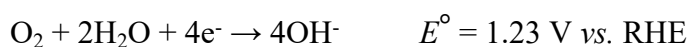

Four reaction steps were considered for drawing free energy diagrams in alkaline media:

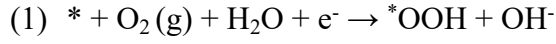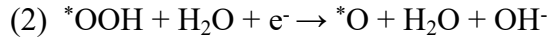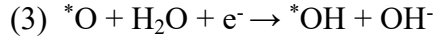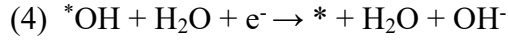

where the asterisk mark (\*) indicates an adsorbed species on the Fe active site.

Free energies ( $\Delta G$ ) or binding energies of the ORR intermediate adsorbate to active sites were calculated with respect to RHE by:

$$\Delta G = \Delta E + \Delta ZPE - T\Delta S - qU + k_{\text{B}}T \ln(10) \beta \text{pH}$$

where  $\Delta E$  = the total energy change;  $\Delta ZPE$  = zero point energy;  $T\Delta S$  = entropic energy;  $q$  = charge transfer for each reaction step;  $U$  = the applied potential;  $k_{\text{B}}$  = Boltzmann constant. The ZPEs were calculated by frozen phonon method.

Bader charges ( $\Delta Q$ ) of Fe of FePc as well as ORR intermediates were calculated along the 4e ORR pathway. The  $\Delta Q$  values of Fe and the intermediates were estimated with respect to Fe atom and molecular oxygen ( $\text{O}_2$ ).

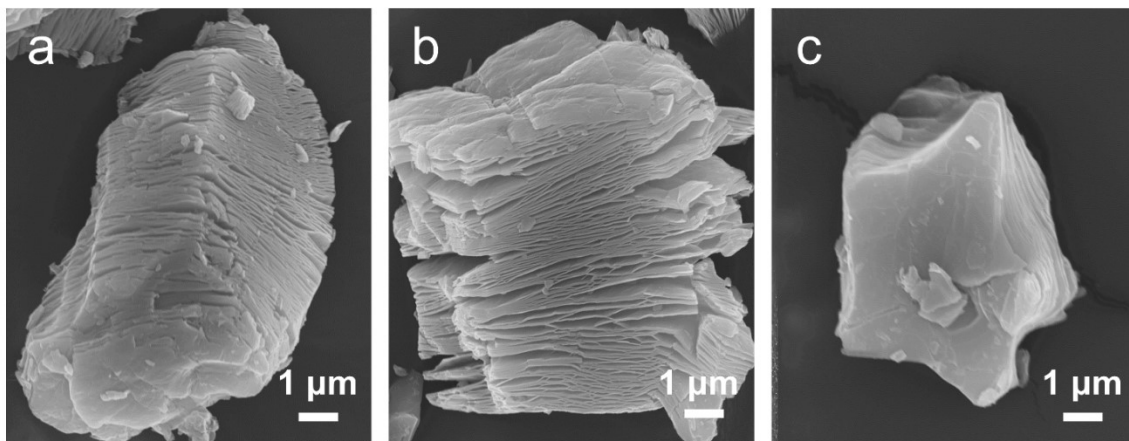

**Fig. S1. Bulky  $\text{Ti}_3\text{C}_2$  having multiple layers ( $m\text{L-Ti}_3\text{C}_2$ ) in SEM images. (a) Overall view. (b) Edge view. (c) Basal view.**

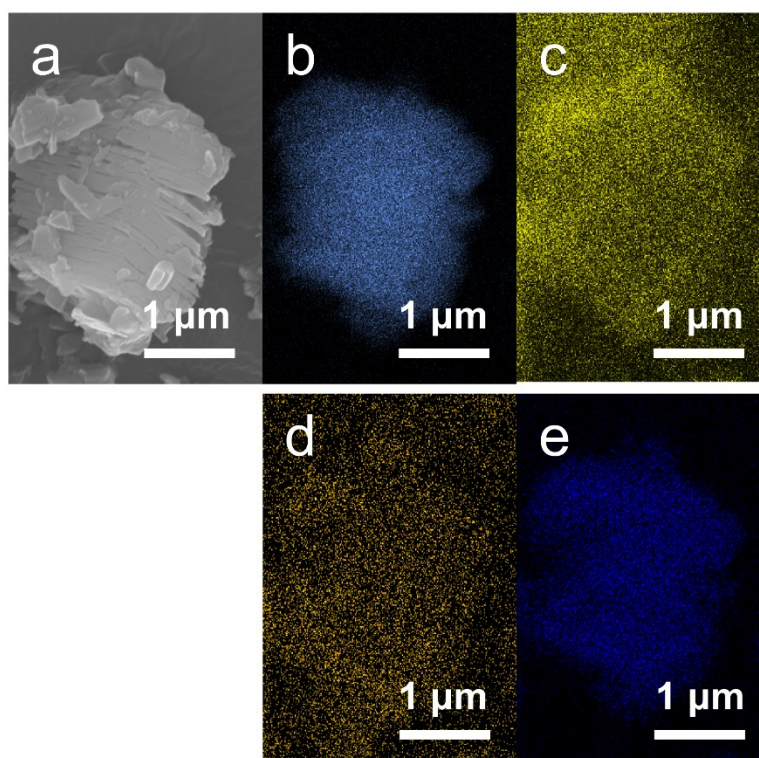

**Fig. S2. Edge plane of  $\text{FePc}/m\text{L-Ti}_3\text{C}_2$  in elemental maps by energy-dispersive X-ray spectroscopy (EDS). (a) Scanning-electron-microscopic (SEM) image. (b) Ti. (c) C. (d) Fe. (e) N.**

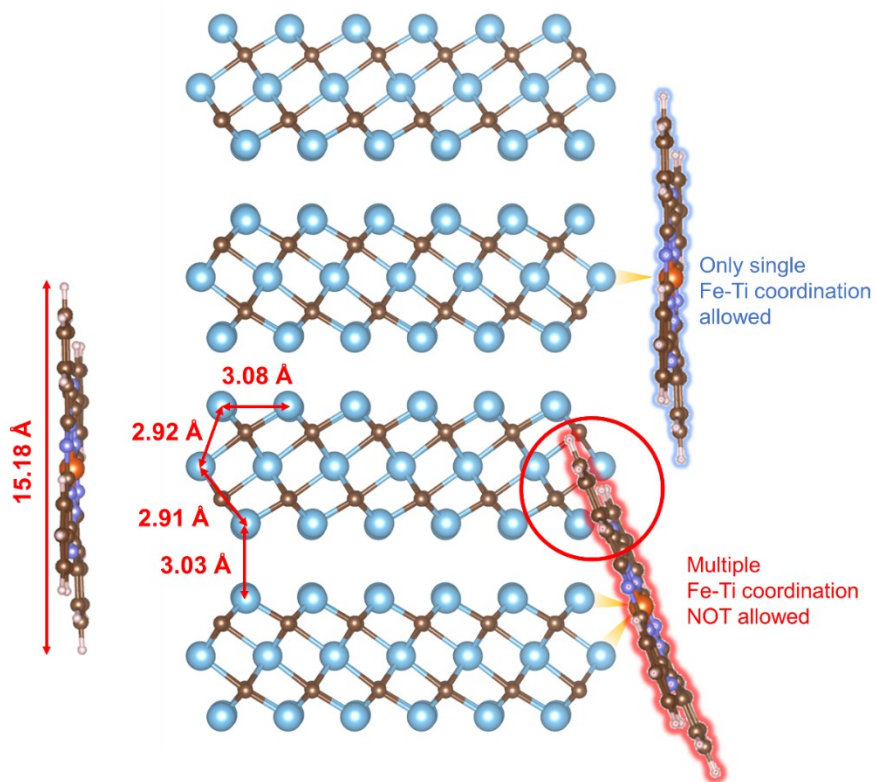

**Fig. S3. Adsorption of FePc onto edge planes of bulky Ti<sub>3</sub>C<sub>2</sub> having multilayers.** The right side of this schematic picture demonstrates that only single Fe-Ti coordination between FePc and Ti<sub>3</sub>C<sub>2</sub> is allowed when FePc is adsorbed on the edge plane of Ti<sub>3</sub>C<sub>2</sub>.

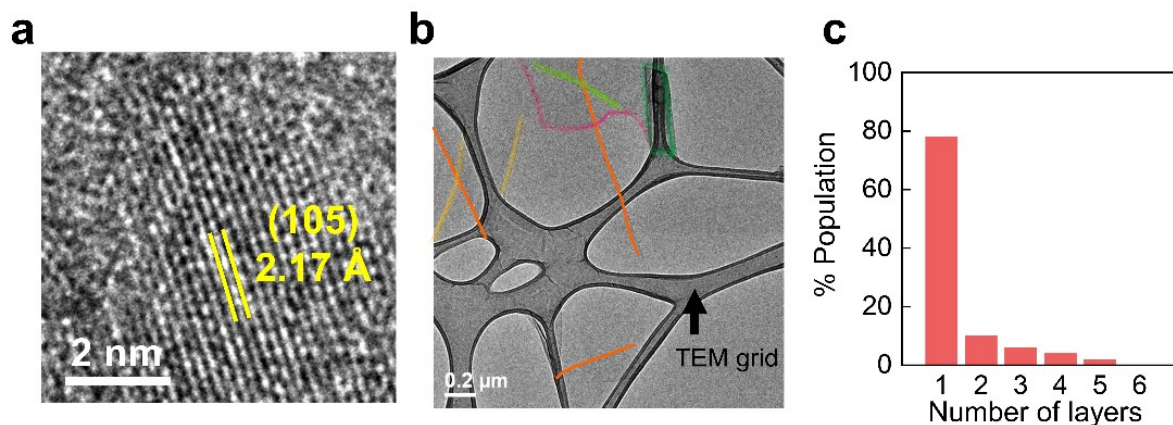

**Fig. S4. Two-dimensional Ti<sub>3</sub>C<sub>2</sub> monolayer leaf (1L-Ti<sub>3</sub>C<sub>2</sub>).** (a) Basal plane by TEM. (b) Several overlapped monolayer leaves by TEM. The boundary of 1L-Ti<sub>3</sub>C<sub>2</sub> leaves was sketched for clarity, each color indicating a separate leaf. (c) Population distribution of the number of layers.

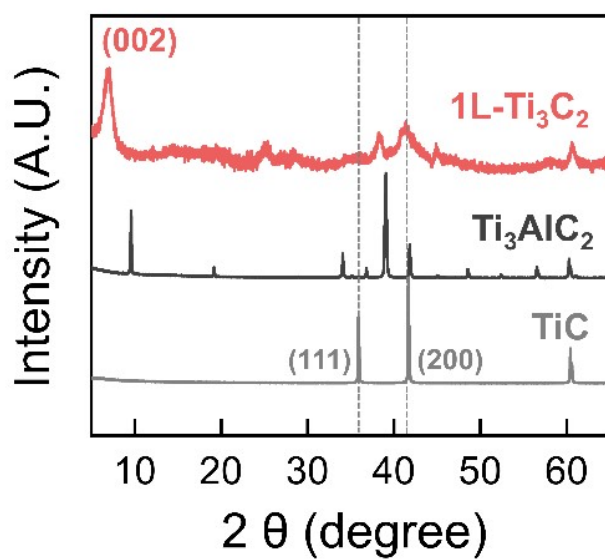

**Fig. S5. XRD spectra of 1L-Ti<sub>3</sub>C<sub>2</sub>, Ti<sub>3</sub>AlC<sub>2</sub> and TiC.**

**Negligible ORR currents on 1L-Ti<sub>3</sub>C<sub>2</sub> as the support without FePc as the ORR catalyst.** A large overpotential was required for ORR on 1L-Ti<sub>3</sub>C<sub>2</sub> in the absence of FePc (**Fig. S6a**). The onset potential of ORR on 1L-Ti<sub>3</sub>C<sub>2</sub> was 0.8 V<sub>RHE</sub>, 0.2 V more negative than that of FePc/1L-Ti<sub>3</sub>C<sub>2</sub>. The ORR current of 1L-Ti<sub>3</sub>C<sub>2</sub> was negligible at > 0.8 V<sub>RHE</sub> where the current of FePc/1L-Ti<sub>3</sub>C<sub>2</sub> increased exponentially. Therefore, we concluded that the catalytic ORR currents were dominantly driven by FePc, not its supports, before reaching their limiting value ( $i_l = -5.6 \text{ mA cm}^{-2}$ ).

Another lesson we can learn from the ORR polarization curves (**Fig. S6a**) is that 4-electron (4e) ORR was more favored on FePc supported by 1L-Ti<sub>3</sub>C<sub>2</sub> while the support without catalysts significantly produced peroxide (HO<sub>2</sub><sup>-</sup>) as an incompletely reduced species via 2e ORR. The number of electrons transferred ( $n$ ) of the ORR on FePc/1L-Ti<sub>3</sub>C<sub>2</sub> was estimated to be almost 4, which was read from its  $i_l$  by Levich equation. On the other hand, the  $i_l$  of 1L-Ti<sub>3</sub>C<sub>2</sub> without catalysts was around a half of FePc/1L-Ti<sub>3</sub>C<sub>2</sub>, supporting 2e ORR rather than 4e ORR. At cathodic potentials enough to encourage both the ORR currents on FePc-present and FePc-absent 1L-Ti<sub>3</sub>C<sub>2</sub> to reach their limiting values,  $n$  was calculated from disk and ring currents of rotating ring disk electrode experiments:  $n \sim 4$  for FePc/1L-Ti<sub>3</sub>C<sub>2</sub>;  $n \sim 3$  for 1L-Ti<sub>3</sub>C<sub>2</sub>. 1L-Ti<sub>3</sub>C<sub>2</sub> was not able to reduce oxygen molecules completely even at enough overpotentials.

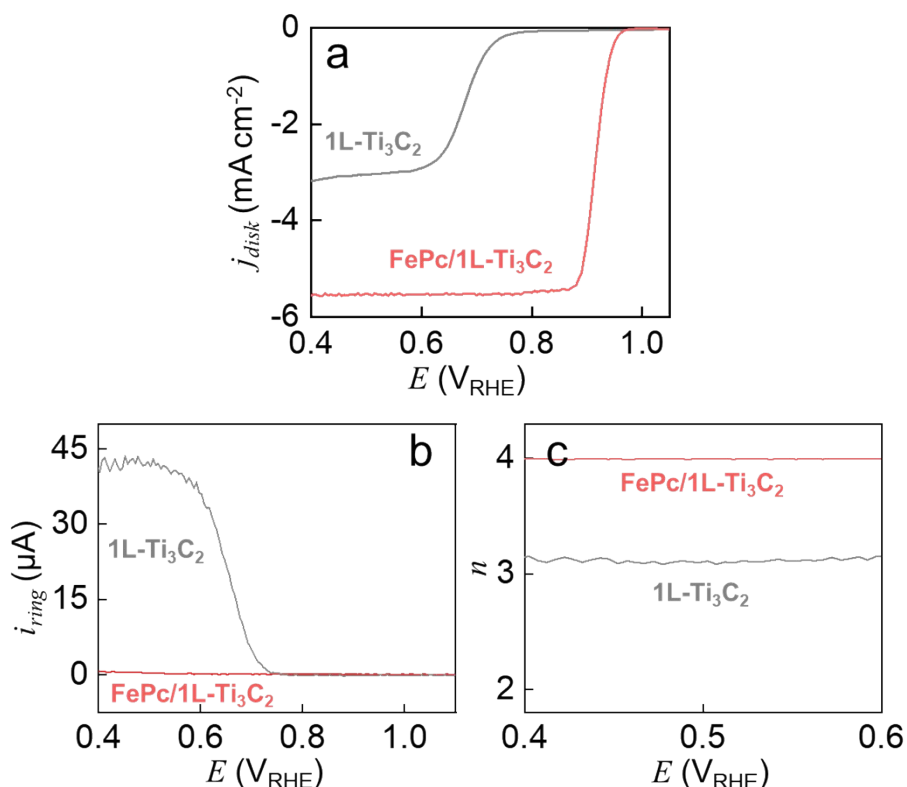

**Fig. S6. ORR on 1L-Ti<sub>3</sub>C<sub>2</sub> with and without FePc.** Disk potential was cathodically scanned. The disk electrode was rotated at 1600 rpm in 0.1 M KOH (aq). (a) Disk current density ( $j_{\text{disk}}$ ) along disk potential. (b) Ring current ( $i_{\text{ring}}$ ) along disk potential. (c) The number of electron transferred ( $n$ ) calculated from disk and ring currents.

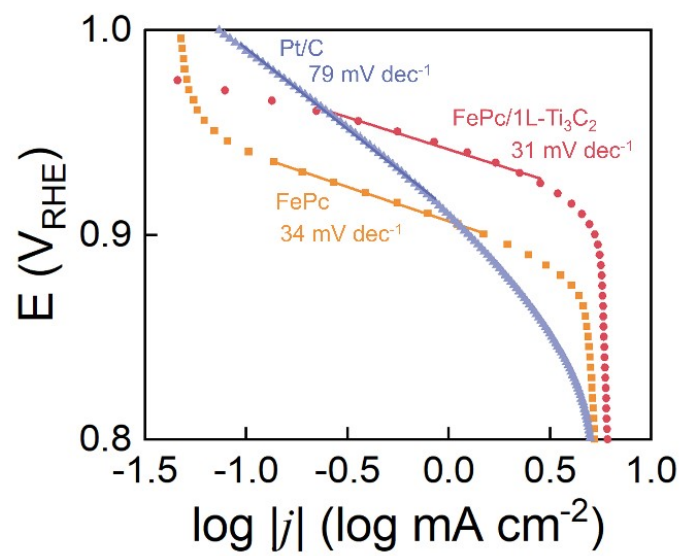

**Fig. S7. Tafel plots.**



**Table S1. ORR metrics comparison of electrocatalysts based on FeN<sub>4</sub> and Fe-N-C active sites.**  $E_{onset}$  = onset potential;  $E_{1/2}$  = half-wave potential;  $b$  = Tafel slope.

| <b>Electrocatalysts</b>                | $E_{onset}$<br><b>V<sub>RHE</sub></b> | $E_{1/2}$<br><b>V<sub>RHE</sub></b> | $b$<br><b>mV dec<sup>-1</sup></b> | <b>Reference</b> |
|----------------------------------------|---------------------------------------|-------------------------------------|-----------------------------------|------------------|
| FePc/1L-Ti <sub>3</sub> C <sub>2</sub> | 1.00                                  | 0.92                                | 31                                | <b>This work</b> |
| FePc/mL-Ti <sub>3</sub> C <sub>2</sub> | 0.97                                  | 0.89                                | -                                 | <b>This work</b> |
| FePc                                   | 0.96                                  | 0.88                                | 34                                | <b>This work</b> |
| Pt/C                                   | 1.03                                  | 0.85                                | 79                                | <b>This work</b> |
| FePc/mL-Ti <sub>3</sub> C <sub>2</sub> | 0.97                                  | 0.89                                | -                                 | 17               |
| FeAB-O                                 | 0.98                                  | 0.90                                | 27.5                              | 18               |
| FePc/AB                                | 0.96                                  | 0.87                                | 37.5                              | 18               |
| Fe-SAs/NSC                             | 1.00                                  | 0.87                                | -                                 | 19               |
| Fe-N/P-C-700                           | 0.94                                  | 0.87                                | -                                 | 20               |
| Fe/OES                                 | 1.00                                  | 0.85                                | -                                 | 21               |
| PCNT@Fe@GL                             | 0.97                                  | 0.87                                | 61.9                              | 22               |
| Fe/SNC                                 | 0.97                                  | 0.85                                | -                                 | 23               |
| FePhen@MOFArNH <sub>3</sub>            | 1.03                                  | 0.86                                | -                                 | 24               |
| Fe <sub>2</sub> -Z <sub>8</sub> -C     | 0.98                                  | 0.87                                | -                                 | 25               |
| FeSAs/PTF-600                          | 1.01                                  | 0.87                                | -                                 | 26               |
| SA-Fe-HPC                              | 1.00                                  | 0.89                                | 49                                | 27               |
| Fe-ISA/NC                              | -                                     | 0.90                                | -                                 | 28               |
| Fe-ISAs/CN                             | 0.99                                  | 0.90                                | -                                 | 29               |
| Fe SAs-N/C-20                          | -                                     | 0.91                                | -                                 | 30               |
| Fe <sub>SA</sub> -N-C                  | -                                     | 0.89                                | -                                 | 31               |
| SA-Fe/NHPC                             | -                                     | 0.87                                | -                                 | 32               |

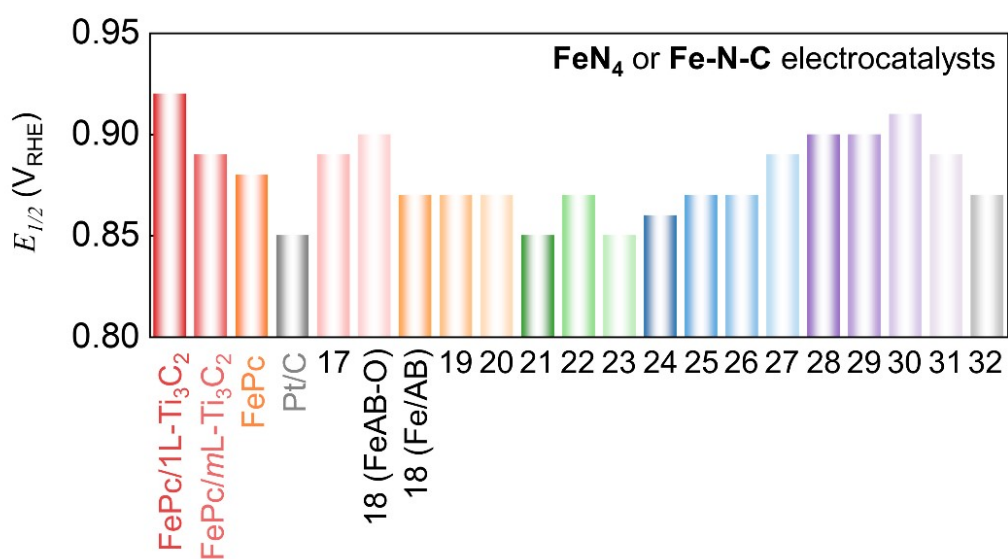

**Fig. S8.**  $E_{1/2}$  comparison from Table S1.

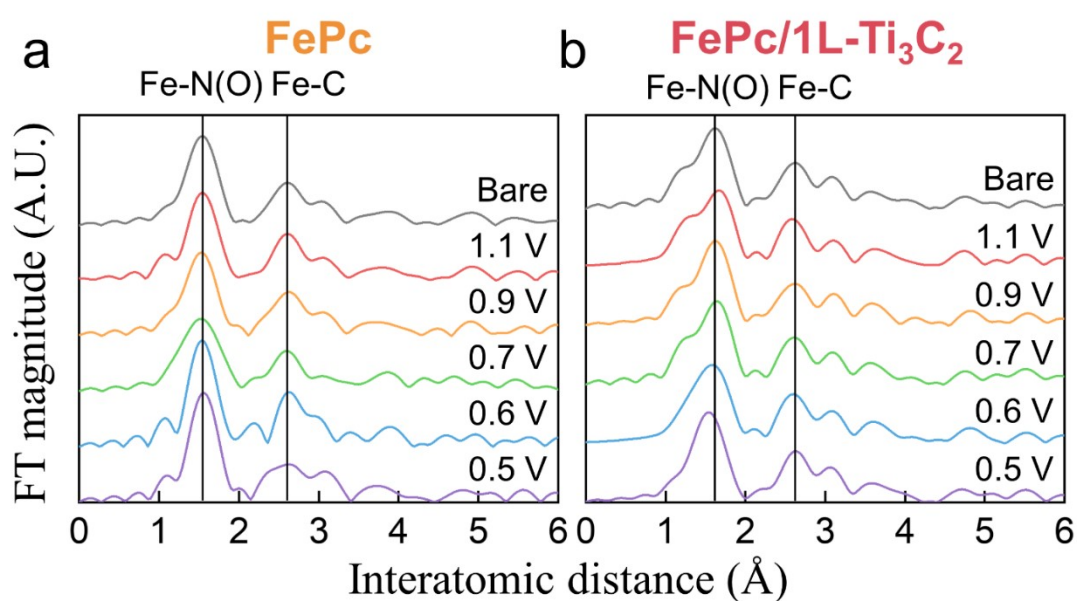

**Fig. S9.** Radial distribution functions obtained by Fourier-transforming EXAFS spectra at indicated potentials. (a) FePc. (b) FePc/1L-Ti<sub>3</sub>C<sub>2</sub>.

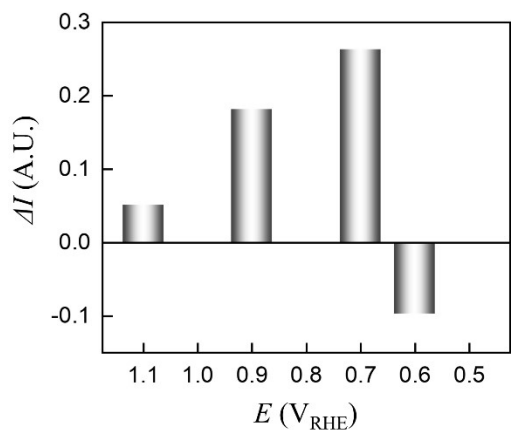

**Fig. S10.** The difference of the maximum intensities between FePc/1L-Ti<sub>3</sub>C<sub>2</sub> and FePc at indicated potentials.  $\Delta I = I_{\text{FePc/1L-Ti}_3\text{C}_2} - I_{\text{FePc}}$  with  $I = \text{maximum intensity}$ . The values of  $I$  was read around 1.5 Å from **Fig. 2b**.

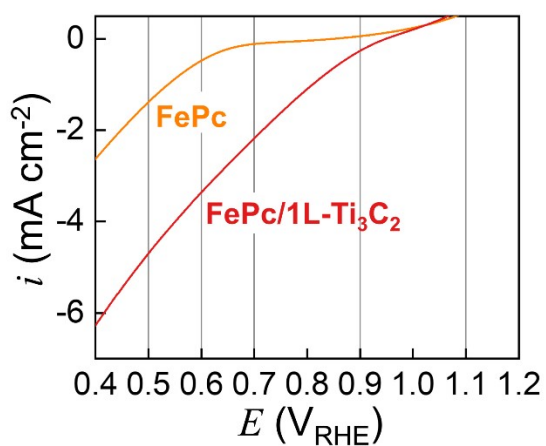

**Fig. S11.** Electrochemical responses of ORR in the cells used for the *Operando* EXAFS experiments (**Fig. 2b**). The cells were constructed with three electrodes: catalyst-loaded carbon papers as the working electrode; platinum as the counter electrode; and Hg/HgO as the reference electrode.

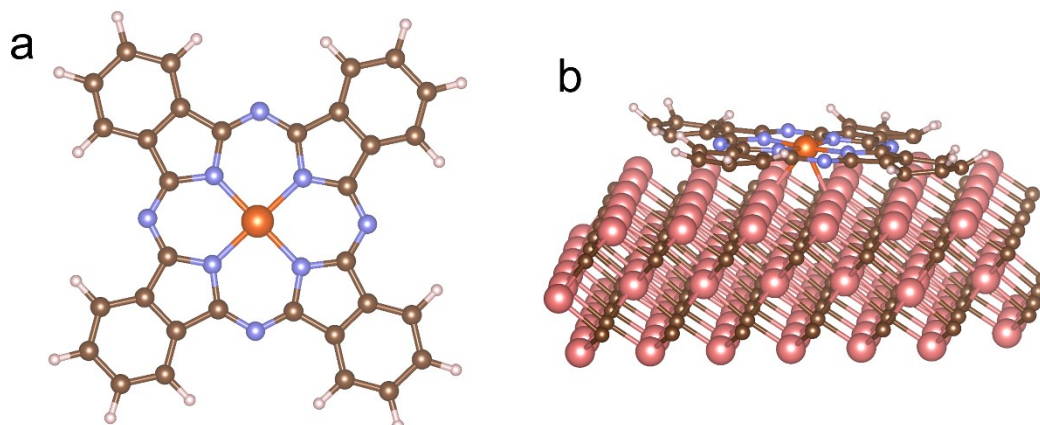

**Fig. S12. Structures.** Refer to **Fig. 1a** for the atomic colors. **(a)** FePc. **(b)** FePc/1L-Ti<sub>3</sub>C<sub>2</sub> with FeTi<sub>2</sub> coordination.

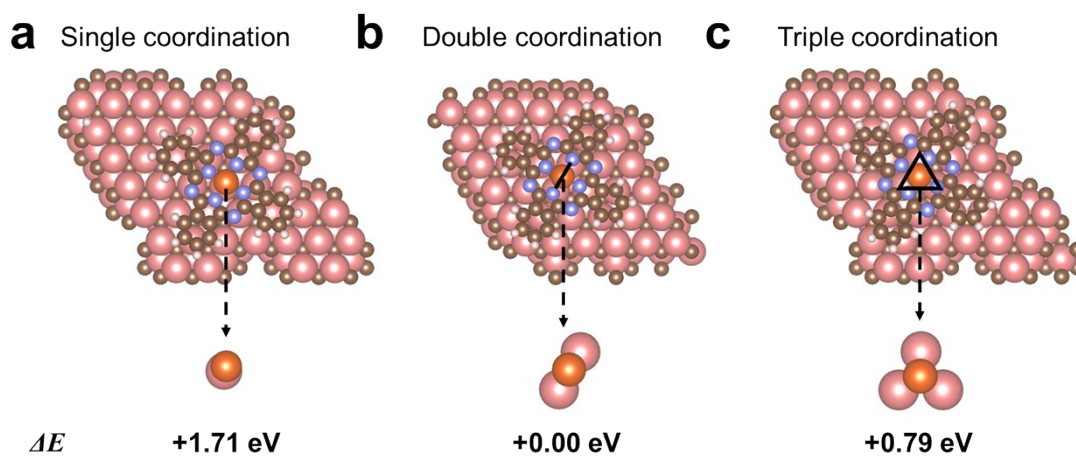

**Fig. S13. The coordination between Fe of FePc and Ti of 1L-Ti<sub>3</sub>C<sub>2</sub>.** Refer to **Fig. 1a** for the atomic colors. The binding energies of FePc to 1L-Ti<sub>3</sub>C<sub>2</sub> ( $\Delta E$ ) were indicated with respect to the double coordination in **b**. **(a)** FeTi coordination. **(b)** FeTi<sub>2</sub> coordination. **(c)** FeTi<sub>3</sub> coordination.

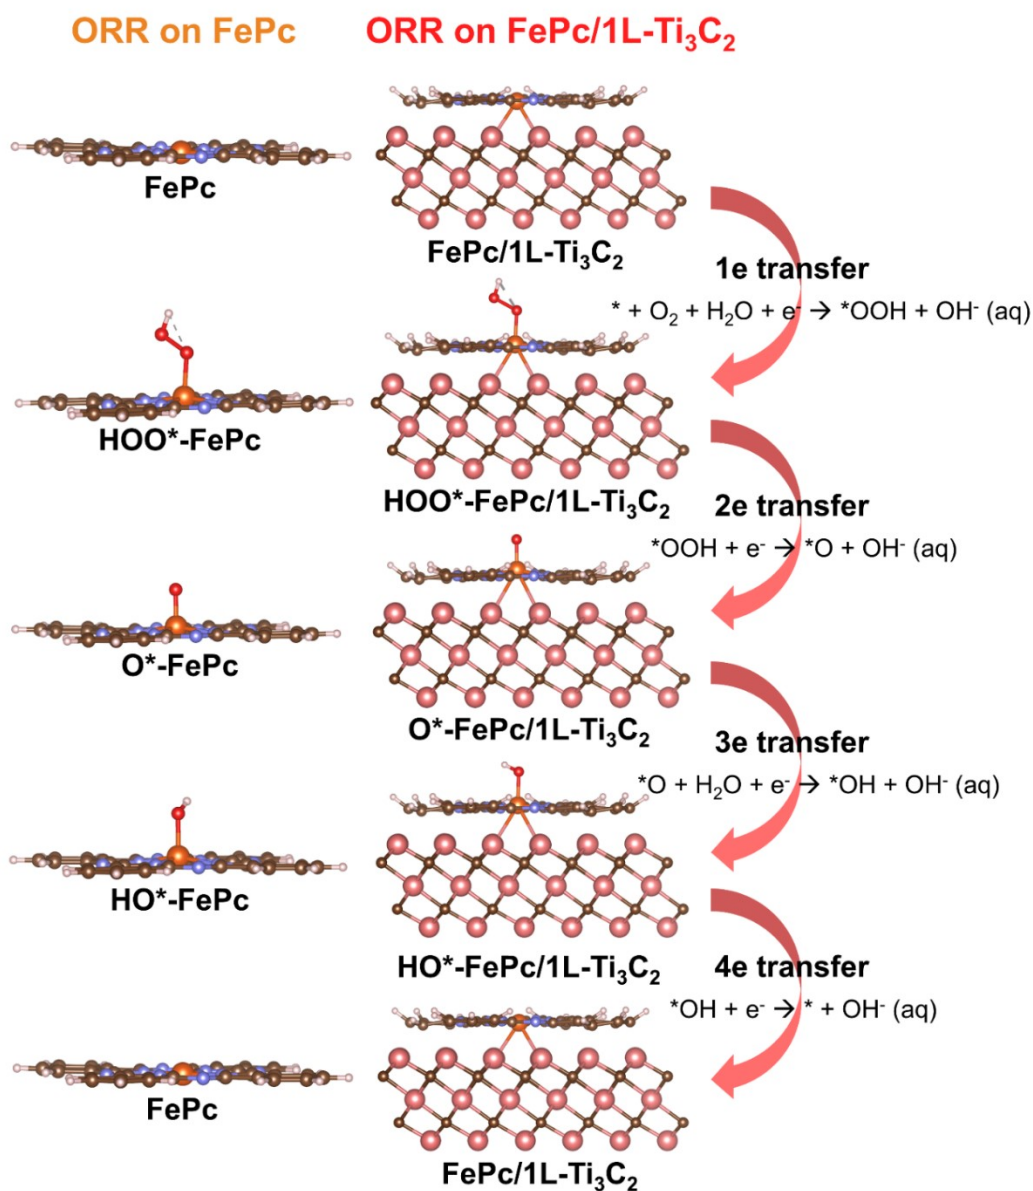

**Fig. S14.** Four-electron (4e) ORR pathway on FePc and FePc/1L-Ti<sub>3</sub>C<sub>2</sub>. The molecular configurations were calculated by DFT.

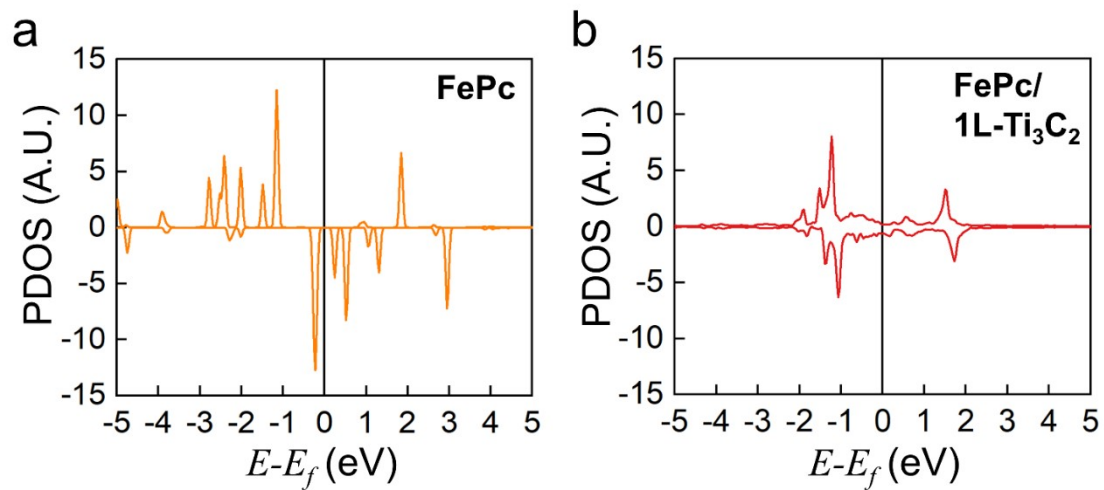

**Fig. S15. Projected density of states (PDOS) of Fe d-orbital.**  $E$  = energy;  $E_f$  = Fermi level.

(a) FePc. (b) FePc/1L-Ti<sub>3</sub>C<sub>2</sub>.

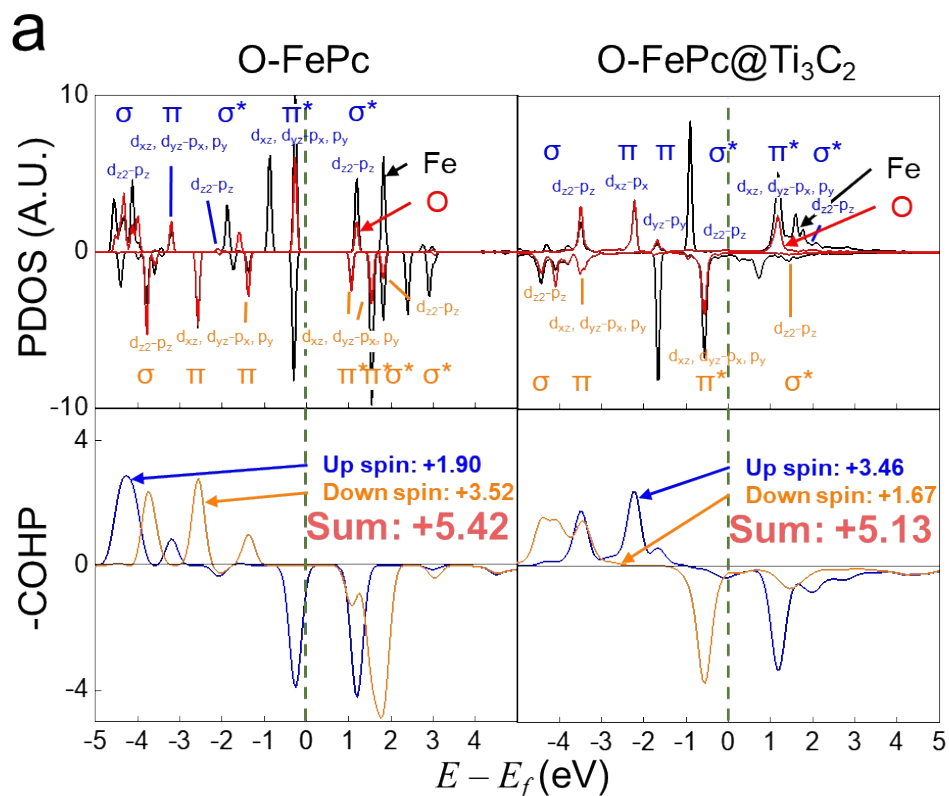

**Fig. S16. Partial density of states (PDOS) and crystal orbital Hamiltonian population (-COHP) of the ORR intermediates adsorbed on 1L-Ti<sub>3</sub>C<sub>2</sub>-supported and unsupported FePc.**  $E$  = energy;  $E_f$  = Fermi level;  $\sigma$  and  $\sigma^*$  = bonding and antibonding sigma molecular orbitals, respectively (resulting from the combination of Fe  $d_z^2$  and O  $p_z$ );  $\pi$  and  $\pi^*$  = bonding and antibonding pi molecular orbitals, respectively (Fe  $d_{yz}$ ,  $d_{zx}$  and O  $p_x$ ,  $p_y$ ). The net summation of -COHP was indicated as a measure of bonding strength. (a) \*O. (b) \*OH. (c) \*OOH.

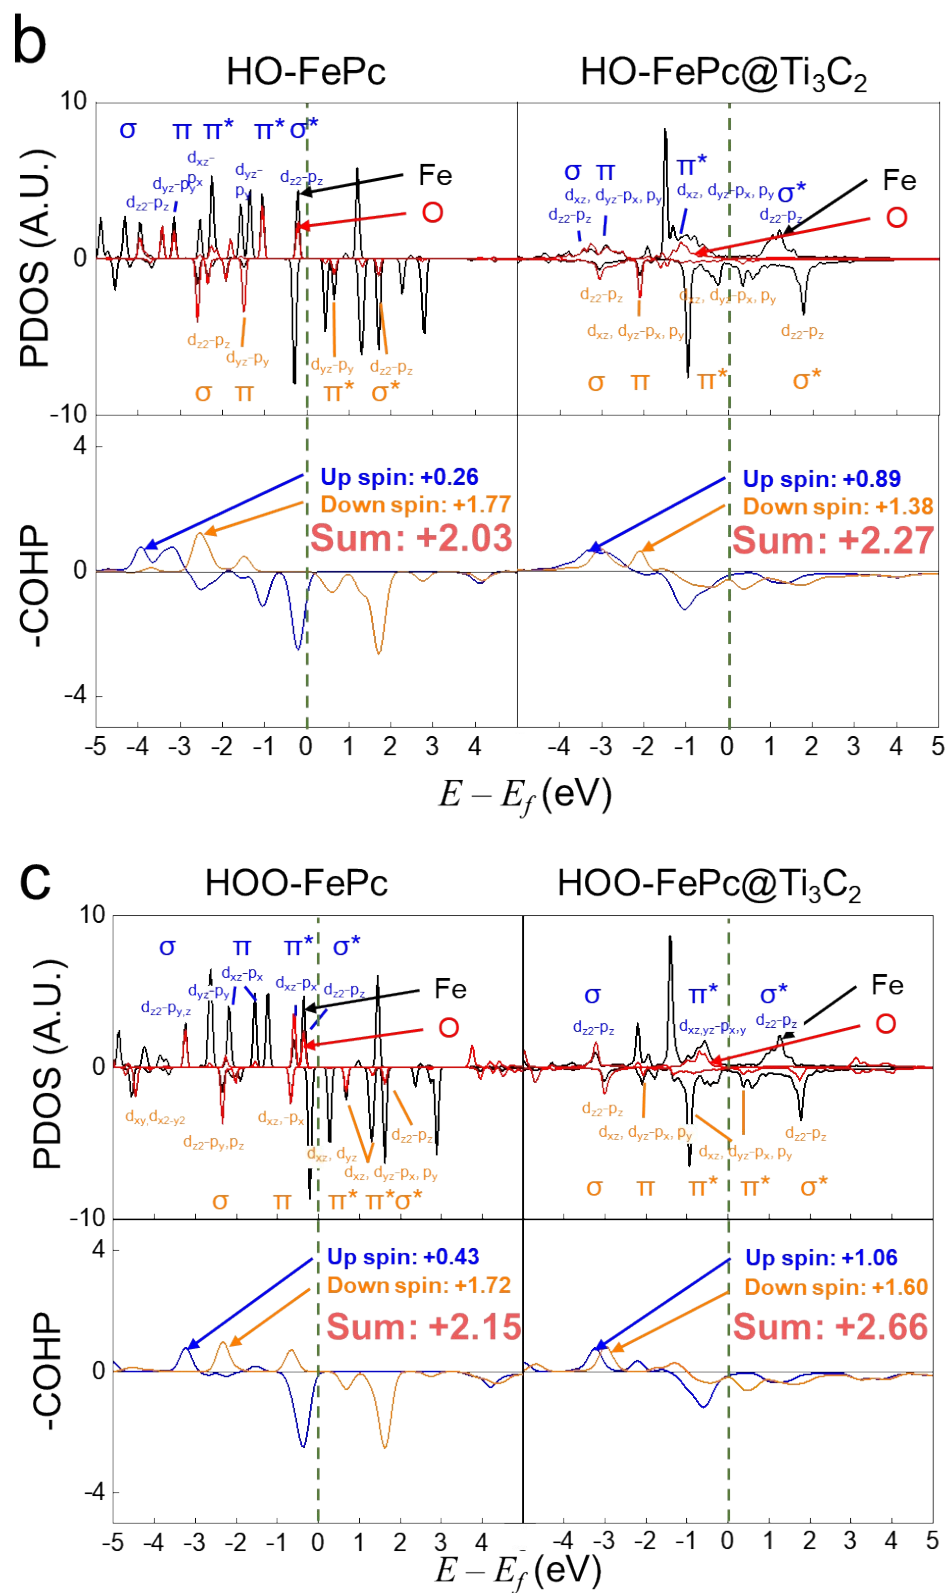

Fig. S16. (Continued) PDOS and -COHP.



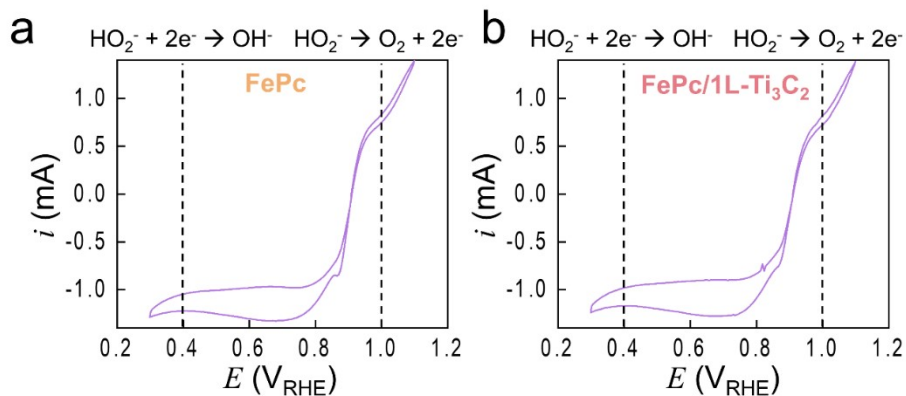

**Fig. S17. Cyclic voltammograms of peroxide reduction reaction (PRR) at the cathodic scan and peroxide oxidation reaction (POR) at the anodic scan.** Counter electrode = Graphite rod; Reference electrode = Hg/HgO; Electrolyte = Ar-purged 0.1 M KOH with 10 mM peroxide; 1600 rpm with 50 mV s<sup>-1</sup>. (a) FePc. (b) FePc/1L-Ti<sub>3</sub>C<sub>2</sub>.

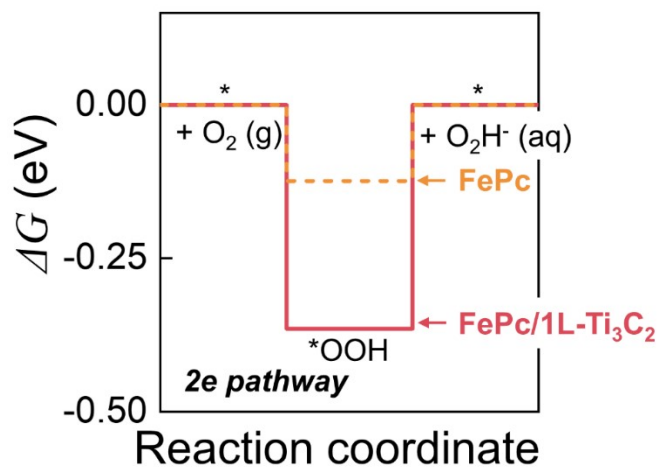

**Fig. S18. Free energy ( $\Delta G$ ) diagrams along the 2-electron-transfer (2e) ORR pathway at the standard reduction potential of peroxide generation (0.7 V<sub>RHE</sub>).**

## References

- 1 G. Kresse and J. Furthmüller, *Phys. Rev. B*, 1996, **54**, 11169–11186.
- 2 G. Kresse and J. Furthmüller, *Comput. Mater. Sci.*, 1996, **6**, 15–50.
- 3 G. Kresse and J. Hafner, *Phys. Rev. B*, 1994, **49**, 14251–14269.
- 4 G. Kresse and J. Hafner, *Phys. Rev. B*, 1993, **47**, 558–561.
- 5 G. Kresse and D. Joubert, *Phys. Rev. B*, 1999, **59**, 1758–1775.
- 6 P. E. Blöchl, *Phys. Rev. B*, 1994, **50**, 17953–17979.
- 7 J. P. Perdew, K. Burke and M. Ernzerhof, *Phys. Rev. Lett.*, 1996, **77**, 3865–3868.
- 8 S. Grimme, *J. Comput. Chem.*, 2006, **27**, 1787–1799.
- 9 R. Dronskowski and P. E. Bloechl, *J. Phys. Chem.*, 1993, **97**, 8617–8624.
- 10 V. L. Deringer, A. L. Tchougréeff and R. Dronskowski, *J. Phys. Chem. A*, 2011, **115**, 5461–5466.
- 11 S. Maintz, V. L. Deringer, A. L. Tchougréeff and R. Dronskowski, *J. Comput. Chem.*, 2013, **34**, 2557–2567.
- 12 S. Maintz, V. L. Deringer, A. L. Tchougréeff and R. Dronskowski, *J. Comput. Chem.*, 2016, **37**, 1030–1035.
- 13 R. Nelson, C. Ertural, J. George, V. L. Deringer, G. Hautier and R. Dronskowski, *J. Comput. Chem.*, 2020, **41**, 1931–1940.
- 14 J. K. Nørskov, J. Rossmeisl, A. Logadottir, L. Lindqvist, J. R. Kitchin, T. Bligaard and H. Jónsson, *J. Phys. Chem. B*, 2004, **108**, 17886–17892.
- 15 Á. Valdés, Z. W. Qu, G. J. Kroes, J. Rossmeisl and J. K. Nørskov, *J. Phys. Chem. C*, 2008, **112**, 9872–9879.
- 16 A. A. Peterson, F. Abild-Pedersen, F. Studt, J. Rossmeisl and J. K. Nørskov, *Energy Environ. Sci.*, 2010, **3**, 1311–1315.
- 17 Z. Li, Z. Zhuang, F. Lv, H. Zhu, L. Zhou, M. Luo, J. Zhu, Z. Lang, S. Feng, W. Chen,

- L. Mai and S. Guo, *Adv. Mater.*, 2018, **30**, 1803220.
- 18 K. Chen, K. Liu, P. An, H. Li, Y. Lin, J. Hu, C. Jia, J. Fu, H. Li, H. Liu, Z. Lin, W. Li, J. Li, Y. R. Lu, T. S. Chan, N. Zhang and M. Liu, *Nat. Commun.*, 2020, **11**, 1–8.
- 19 J. Zhang, Y. Zhao, C. Chen, Y.-C. Huang, C.-L. Dong, C.-J. Chen, R.-S. Liu, C. Wang, K. Yan, Y. Li and G. Wang, *J. Am. Chem. Soc.*, 2019, **141**, 20118–20126.
- 20 K. Yuan, D. Lützenkirchen-Hecht, L. Li, L. Shuai, Y. Li, R. Cao, M. Qiu, X. Zhuang, M. K. H. Leung, Y. Chen and U. Scherf, *J. Am. Chem. Soc.*, 2020, **142**, 2404–2412.
- 21 C. Hou, L. Zou, L. Sun, K. Zhang, Z. Liu, Y. Li, C. Li, R. Zou, J. Yu and Q. Xu, *Angew. Chemie*, 2020, **132**, 7454–7459.
- 22 S. H. Ahn, X. Yu and A. Manthiram, *Adv. Mater.*, 2017, **29**, 1606534.
- 23 P. Chen, T. Zhou, L. Xing, K. Xu, Y. Tong, H. Xie, L. Zhang, W. Yan, W. Chu, C. Wu and Y. Xie, *Angew. Chemie*, 2017, **129**, 625–629.
- 24 K. Strickland, E. Miner, Q. Jia, U. Tylus, N. Ramaswamy, W. Liang, M.-T. Sougrati, F. Jaouen and S. Mukerjee, *Nat. Commun.*, 2015, **6**, 7343.
- 25 Q. Liu, X. Liu, L. Zheng and J. Shui, *Angew. Chemie*, 2018, **130**, 1218–1222.
- 26 J.-D. Yi, R. Xu, Q. Wu, T. Zhang, K.-T. Zang, J. Luo, Y.-L. Liang, Y.-B. Huang and R. Cao, *ACS Energy Lett.*, 2018, **3**, 883–889.
- 27 Z. Zhang, J. Sun, F. Wang and L. Dai, *Angew. Chemie*, 2018, **130**, 9176–9181.
- 28 Q. Li, W. Chen, H. Xiao, Y. Gong, Z. Li, L. Zheng, X. Zheng, W. Yan, W. Cheong, R. Shen, N. Fu, L. Gu, Z. Zhuang, C. Chen, D. Wang, Q. Peng, J. Li and Y. Li, *Adv. Mater.*, 2018, **30**, 1800588.
- 29 Y. Chen, S. Ji, Y. Wang, J. Dong, W. Chen, Z. Li, R. Shen, L. Zheng, Z. Zhuang, D. Wang and Y. Li, *Angew. Chemie*, 2017, **129**, 7041–7045.
- 30 R. Jiang, L. Li, T. Sheng, G. Hu, Y. Chen and L. Wang, *J. Am. Chem. Soc.*, 2018, **140**, 11594–11598.

- 31 L. Jiao, G. Wan, R. Zhang, H. Zhou, S. Yu and H. Jiang, *Angew. Chemie Int. Ed.*, 2018, **57**, 8525–8529.
- 32 Z. Zhang, X. Gao, M. Dou, J. Ji and F. Wang, *Small*, 2017, **13**, 1604290.
